# Supplementary material for: A Cas-embedding strategy for minimizing off-target effects of DNA base editors
Source: PubMed Central journal article supplement (PMC7695861; doi:10.1038/s41467-020-19690-0), 2020-11-27
Supplement: 41467_2020_19690_MOESM1_ESM.pdf [file 41467_2020_19690_MOESM1_ESM.pdf]

# Supplementary Information

**Liu et al**

**A Cas-Embedding Strategy for Minimizing Off-Target Effects of DNA Base Editors**

Supplementary Figure 1: Genetic screen for tolerant nCas9 sites

Supplementary Figure 2: GOTI data in detail



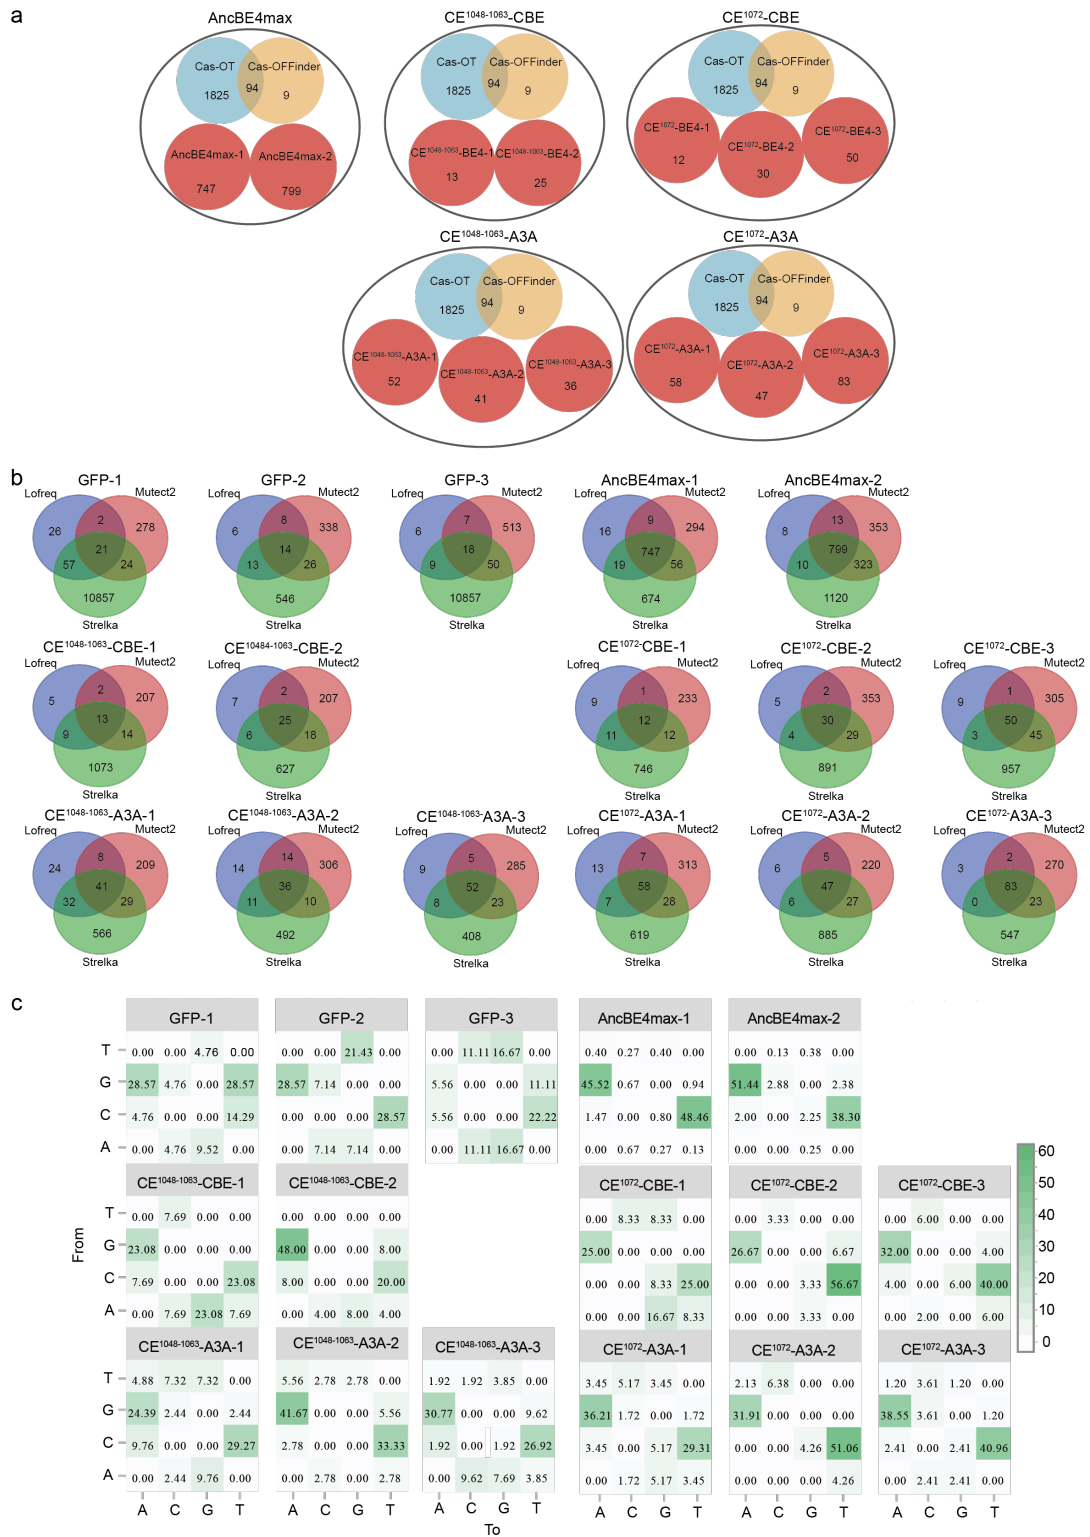

**Supplementary Figure 2. GOT1 data in detail.** **a**, No overlap between the shared SNVs and the potential gRNA-dependent off-targets predicted by Cas-OT or OFFinder. **b**, SNVs in individual embryos treated with indicated proteins. Three software (Lofreq, Mutect2 and Strelka) were used to identify SNVs, with the shared SNVs detected by all the softwares considered genuine. **c**, Composition of the shared SNVs. The values are the frequencies of the indicated nucleotide alterations.
