# Supplementary material for: A Cas-embedding strategy for minimizing off-target effects of DNA base editors
Source: PubMed Central journal article supplement (PMC7695861; doi:10.1038/s41467-020-19690-0), 2020-11-27
Supplement: 41467_2020_19690_MOESM3_ESM.pdf [file 41467_2020_19690_MOESM3_ESM.pdf]

**Title:** Supplementary Data 1:

**Descriptions:** Presents "Plasmid and primer sequences"

**Title:** Supplementary Data 2:

**Descriptions:** Presents "Mu-insertion library sequencing results"
